# Supplementary material for: Severe Drought Still Affects Reproductive Traits Two Years Later in a Common Garden Experiment of Frangula alnus
Source: MDPI journal article supplement (doi:10.3390/f14040857), 2023-04-21
Supplement: s1 [file s1]

Archive with 1 entries (1 files):
- forests-2272120-supplementary.pdf
