# Supplementary material for: Severe Drought Still Affects Reproductive Traits Two Years Later in a Common Garden Experiment of Frangula alnus
Source: MDPI journal article supplement (doi:10.3390/f14040857), 2023-04-21
Supplement: s1 [file s1 › forests-2272120-supplementary.pdf]

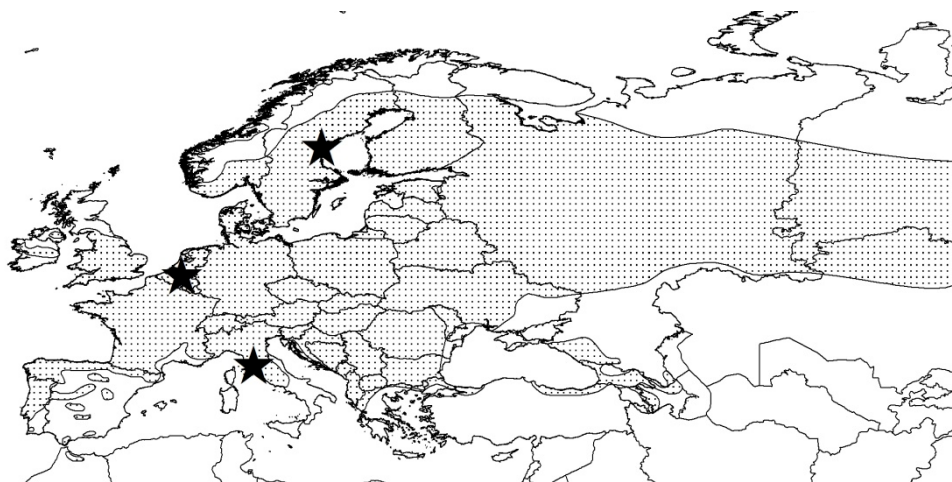

**Figure S1.** Distribution map of *Frangula alnus* in Europe, freely available at euforgen.org (accessed on 12/10/2022), with indication of the sampling sites (asterix).

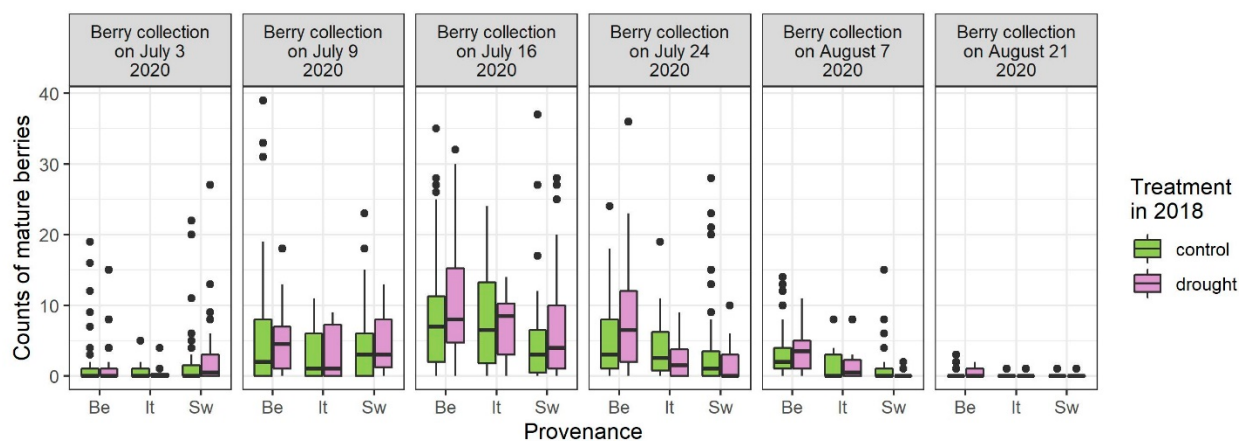

**Figure S2.** Boxplots of mature berry counts in 2020, according to the treatment in 2018, the provenance (Be: Belgian, It: Italian, Sw: Swedish) and the berry collection days in 2020. Be: Belgian, It: Italian, Sw: Swedish.

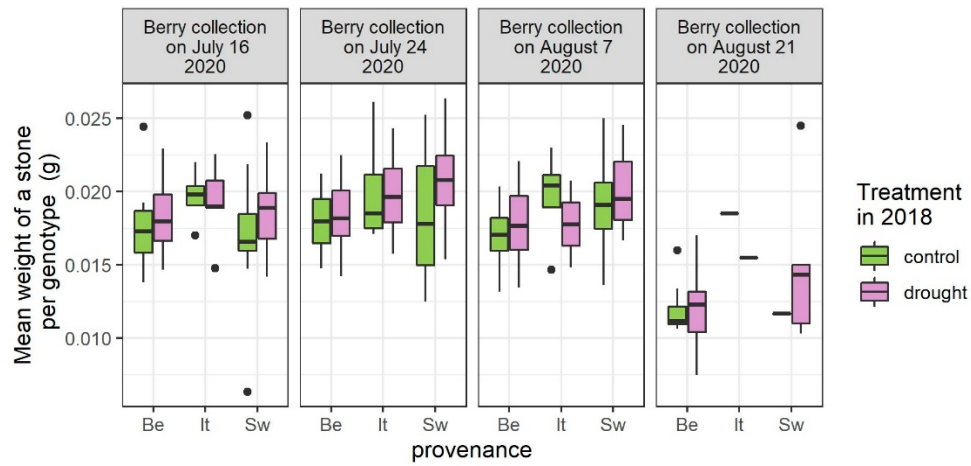

**Figure S3.** Boxplots of the mean weight of a stone, according to the treatment in 2018, the provenance and the day of berry collection in 2020. Be: Belgian, It: Italian, Sw: Swedish.

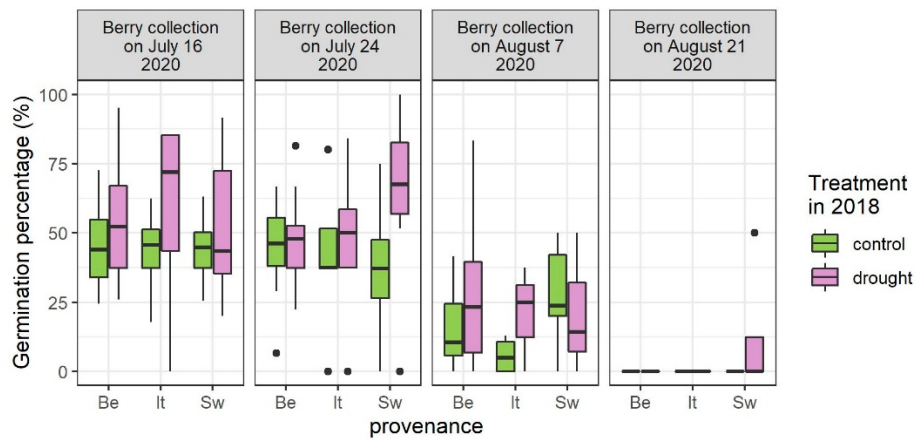

**Figure S4.** Boxplots of the germination percentage, according to the day of berry collection in 2020, the provenance and the treatment in 2018. Be: Belgian, It: Italian, Sw: Swedish.
